# Supplementary material for: PLncWX: A Machine-Learning Algorithm for Plant lncRNA Identification Based on WOA-XGBoost
Source: Hindawi journal article supplement (doi:10.1155/2021/6256021), 2021-12-31
Supplement: f1 [file 6256021.f1.pdf]

Table S1: the accuracy of seven filter feature selection methods under the different numbers of features in three single classifiers including KNN, GaussianNB, SVM, respectively.

| Methods    | n  | KNN          | GaussianNB   | SVM          | Index                                                                    |
|------------|----|--------------|--------------|--------------|--------------------------------------------------------------------------|
| -          | 89 | 80.65        | 77.58        | 90.37        |                                                                          |
| chi_square | 1  | 77.35        | 79.28        | 79.35        | [87]                                                                     |
|            | 2  | 91.21        | 88.90        | 90.77        | [87, 86]                                                                 |
|            | 3  | 91.25        | <b>89.03</b> | 90.79        | [87, 86, 84]                                                             |
|            | 4  | <b>91.28</b> | 88.87        | 90.69        | [87, 86, 84, 70]                                                         |
|            | 5  | 90.55        | 88.43        | <b>90.84</b> | [87, 86, 84, 70, 68]                                                     |
|            | 6  | 89.63        | 88.27        | 90.78        | [87, 86, 84, 70, 68, 83]                                                 |
|            | 7  | 88.73        | 88.35        | 90.77        | [87, 86, 84, 70, 68, 83, 60]                                             |
|            | 8  | 89.13        | 87.53        | 90.73        | [87, 86, 84, 70, 68, 83, 60, 88]                                         |
|            | 9  | 88.88        | 87.35        | 90.75        | [87, 86, 84, 70, 68, 83, 60, 88, 23]                                     |
|            | 10 | 88.16        | 87.23        | 90.74        | [87, 86, 84, 70, 68, 83, 60, 88, 23, 78]                                 |
|            | 11 | 87.82        | 87.17        | 90.69        | [87, 86, 84, 70, 68, 83, 60, 88, 23, 78, 53]                             |
|            | 12 | 87.56        | 86.94        | 90.70        | [87, 86, 84, 70, 68, 83, 60, 88, 23, 78, 53, 19]                         |
|            | 13 | 87.27        | 86.78        | 90.66        | [87, 86, 84, 70, 68, 83, 60, 88, 23, 78, 53, 19, 32]                     |
|            | 14 | 87.35        | 86.72        | 90.63        | [87, 86, 84, 70, 68, 83, 60, 88, 23, 78, 53, 19, 32, 26]                 |
|            | 15 | 87.27        | 86.48        | 90.79        | [87, 86, 84, 70, 68, 83, 60, 88, 23, 78, 53, 19, 32, 26, 16]             |
|            | 16 | 87.33        | 86.23        | 90.79        | [87, 86, 84, 70, 68, 83, 60, 88, 23, 78, 53, 19, 32, 26, 16, 64]         |
|            | 17 | 86.98        | 85.99        | 90.78        | [87, 86, 84, 70, 68, 83, 60, 88, 23, 78, 53, 19, 32, 26, 16, 64, 80]     |
|            | 18 | 87.09        | 85.93        | 90.79        | [87, 86, 84, 70, 68, 83, 60, 88, 23, 78, 53, 19, 32, 26, 16, 64, 80, 82] |
|            | 19 | 86.68        | 85.86        | 90.78        | [87, 86, 84, 70, 68, 83, 60, 88, 23, 78, 53, 19, 32, 26, 16, 64, 80, 82, |

|                   |    |       |       |       |                                                                                                                 |
|-------------------|----|-------|-------|-------|-----------------------------------------------------------------------------------------------------------------|
|                   |    |       |       |       | 35]                                                                                                             |
| <b>chi_square</b> | 20 | 85.93 | 85.82 | 90.79 | [87, 86, 84, 70, 68, 83, 60, 88, 23, 78, 53, 19, 32, 26, 16, 64, 80, 82, 35, 10]                                |
|                   | 21 | 85.66 | 85.43 | 90.83 | [87, 86, 84, 70, 68, 83, 60, 88, 23, 78, 53, 19, 32, 26, 16, 64, 80, 82, 35, 10, 50]                            |
|                   | 22 | 85.32 | 85.59 | 90.70 | [87, 86, 84, 70, 68, 83, 60, 88, 23, 78, 53, 19, 32, 26, 16, 64, 80, 82, 35, 10, 50, 44]                        |
|                   | 23 | 85.24 | 85.59 | 90.64 | [87, 86, 84, 70, 68, 83, 60, 88, 23, 78, 53, 19, 32, 26, 16, 64, 80, 82, 35, 10, 50, 44, 13]                    |
|                   | 24 | 84.90 | 85.43 | 90.73 | [87, 86, 84, 70, 68, 83, 60, 88, 23, 78, 53, 19, 32, 26, 16, 64, 80, 82, 35, 10, 50, 44, 13, 61]                |
|                   | 25 | 84.93 | 85.40 | 90.80 | [87, 86, 84, 70, 68, 83, 60, 88, 23, 78, 53, 19, 32, 26, 16, 64, 80, 82, 35, 10, 50, 44, 13, 61, 58]            |
|                   | 26 | 84.97 | 85.07 | 90.78 | [87, 86, 84, 70, 68, 83, 60, 88, 23, 78, 53, 19, 32, 26, 16, 64, 80, 82, 35, 10, 50, 44, 13, 61, 58, 3]         |
|                   | 27 | 84.82 | 84.80 | 90.74 | [87, 86, 84, 70, 68, 83, 60, 88, 23, 78, 53, 19, 32, 26, 16, 64, 80, 82, 35, 10, 50, 44, 13, 61, 58, 3, 20]     |
|                   | 28 | 84.59 | 84.65 | 90.73 | [87, 86, 84, 70, 68, 83, 60, 88, 23, 78, 53, 19, 32, 26, 16, 64, 80, 82, 35, 10, 50, 44, 13, 61, 58, 3, 20, 51] |
|                   | 29 | 84.38 | 84.35 | 90.72 | [87, 86, 84, 70, 68, 83, 60, 88, 23, 78, 53, 19, 32, 26, 16, 64, 80, 82,                                        |

|                   |    |              |              |              |                                                                                                                         |
|-------------------|----|--------------|--------------|--------------|-------------------------------------------------------------------------------------------------------------------------|
|                   |    |              |              |              | 35, 10, 50, 44, 13, 61, 58, 3, 20, 51, 59]                                                                              |
| <b>chi_square</b> | 30 | 84.28        | 84.27        | 90.72        | [87, 86, 84, 70, 68, 83, 60, 88, 23, 78, 53, 19, 32, 26, 16, 64, 80, 82, 35, 10, 50, 44, 13, 61, 58, 3, 20, 51, 59, 46] |
| <b>f_score</b>    | 1  | 77.35        | 79.28        | 79.35        | [87]                                                                                                                    |
|                   | 2  | <b>91.21</b> | 88.90        | 90.77        | [87, 86]                                                                                                                |
|                   | 3  | 90.99        | <b>88.92</b> | 90.65        | [87, 86, 88]                                                                                                            |
|                   | 4  | 91.13        | 87.78        | 90.68        | [87, 86, 88, 84]                                                                                                        |
|                   | 5  | 91.16        | 87.97        | 90.66        | [87, 86, 88, 84, 70]                                                                                                    |
|                   | 6  | 90.36        | 87.93        | 90.54        | [87, 86, 88, 84, 70, 60]                                                                                                |
|                   | 7  | 89.69        | 87.81        | 90.47        | [87, 86, 88, 84, 70, 60, 78]                                                                                            |
|                   | 8  | 88.94        | 87.53        | 90.77        | [87, 86, 88, 84, 70, 60, 78, 68]                                                                                        |
|                   | 9  | 88.43        | 87.49        | 90.73        | [87, 86, 88, 84, 70, 60, 78, 68, 53]                                                                                    |
|                   | 10 | 88.21        | 87.48        | 90.66        | [87, 86, 88, 84, 70, 60, 78, 68, 53, 64]                                                                                |
|                   | 11 | 88.26        | 87.32        | 90.82        | [87, 86, 88, 84, 70, 60, 78, 68, 53, 64, 16]                                                                            |
|                   | 12 | 88.24        | 87.17        | 90.82        | [87, 86, 88, 84, 70, 60, 78, 68, 53, 64, 16, 83]                                                                        |
|                   | 13 | 87.88        | 87.01        | <b>90.83</b> | [87, 86, 88, 84, 70, 60, 78, 68, 53, 64, 16, 83, 32]                                                                    |
|                   | 14 | 87.74        | 86.73        | 90.75        | [87, 86, 88, 84, 70, 60, 78, 68, 53, 64, 16, 83, 32, 19]                                                                |
|                   | 15 | 87.48        | 86.51        | 90.74        | [87, 86, 88, 84, 70, 60, 78, 68, 53, 64, 16, 83, 32, 19, 2]                                                             |
|                   | 16 | 87.05        | 86.44        | 90.72        | [87, 86, 88, 84, 70, 60, 78, 68, 53, 64, 16, 83, 32, 19, 2, 12]                                                         |
|                   | 17 | 86.66        | 86.23        | 90.71        | [87, 86, 88, 84, 70, 60, 78, 68, 53, 64, 16, 83, 32, 19, 2, 12, 3]                                                      |
|                   | 18 | 86.13        | 85.98        | 90.72        | [87, 86, 88, 84, 70, 60, 78, 68, 53, 64, 16, 83, 32, 19, 2, 12, 3, 23]                                                  |
|                   | 19 | 85.92        | 85.90        | 90.70        | [87, 86, 88, 84, 70, 60,                                                                                                |

|                |    |       |       |       |                                                                                                                |
|----------------|----|-------|-------|-------|----------------------------------------------------------------------------------------------------------------|
|                |    |       |       |       | 78, 68, 53, 64, 16, 83, 32, 19, 2, 12, 3, 23, 26]                                                              |
| <b>f_score</b> | 20 | 85.91 | 85.69 | 90.65 | [87, 86, 88, 84, 70, 60, 78, 68, 53, 64, 16, 83, 32, 19, 2, 12, 3, 23, 26, 59]                                 |
|                | 21 | 85.87 | 85.59 | 90.69 | [87, 86, 88, 84, 70, 60, 78, 68, 53, 64, 16, 83, 32, 19, 2, 12, 3, 23, 26, 59, 82]                             |
|                | 22 | 85.45 | 85.26 | 90.76 | [87, 86, 88, 84, 70, 60, 78, 68, 53, 64, 16, 83, 32, 19, 2, 12, 3, 23, 26, 59, 82, 50]                         |
|                | 23 | 85.26 | 85.13 | 90.71 | [87, 86, 88, 84, 70, 60, 78, 68, 53, 64, 16, 83, 32, 19, 2, 12, 3, 23, 26, 59, 82, 50, 51]                     |
|                | 24 | 85.13 | 84.72 | 90.65 | [87, 86, 88, 84, 70, 60, 78, 68, 53, 64, 16, 83, 32, 19, 2, 12, 3, 23, 26, 59, 82, 50, 51, 14]                 |
|                | 25 | 85.08 | 84.75 | 90.69 | [87, 86, 88, 84, 70, 60, 78, 68, 53, 64, 16, 83, 32, 19, 2, 12, 3, 23, 26, 59, 82, 50, 51, 14, 79]             |
|                | 26 | 85.07 | 85.11 | 90.78 | [87, 86, 88, 84, 70, 60, 78, 68, 53, 64, 16, 83, 32, 19, 2, 12, 3, 23, 26, 59, 82, 50, 51, 14, 79, 73]         |
|                | 27 | 84.55 | 85.00 | 90.63 | [87, 86, 88, 84, 70, 60, 78, 68, 53, 64, 16, 83, 32, 19, 2, 12, 3, 23, 26, 59, 82, 50, 51, 14, 79, 73, 22]     |
|                | 28 | 84.43 | 84.80 | 90.57 | [87, 86, 88, 84, 70, 60, 78, 68, 53, 64, 16, 83, 32, 19, 2, 12, 3, 23, 26, 59, 82, 50, 51, 14, 79, 73, 22, 35] |
|                | 29 | 84.30 | 84.45 | 90.53 | [87, 86, 88, 84, 70, 60,                                                                                       |

|                   |    |              |              |              |                                                                                                                        |
|-------------------|----|--------------|--------------|--------------|------------------------------------------------------------------------------------------------------------------------|
|                   |    |              |              |              | 78, 68, 53, 64, 16, 83, 32, 19, 2, 12, 3, 23, 26, 59, 82, 50, 51, 14, 79, 73, 22, 35, 80]                              |
| <b>f_score</b>    | 30 | 84.18        | 83.97        | 90.50        | [87, 86, 88, 84, 70, 60, 78, 68, 53, 64, 16, 83, 32, 19, 2, 12, 3, 23, 26, 59, 82, 50, 51, 14, 79, 73, 22, 35, 80, 20] |
| <b>gini_index</b> | 1  | 90.03        | <b>89.69</b> | <b>90.82</b> | [86]                                                                                                                   |
|                   | 2  | <b>91.21</b> | 88.90        | 90.77        | [86, 87]                                                                                                               |
|                   | 3  | 90.99        | 88.92        | 90.65        | [86, 87, 88]                                                                                                           |
|                   | 4  | 91.13        | 87.78        | 90.68        | [86, 87, 88, 84]                                                                                                       |
|                   | 5  | 90.96        | 87.86        | 90.53        | [86, 87, 88, 84, 60]                                                                                                   |
|                   | 6  | 90.22        | 87.76        | 90.51        | [86, 87, 88, 84, 60, 78]                                                                                               |
|                   | 7  | 89.59        | 87.52        | 90.41        | [86, 87, 88, 84, 60, 78, 14]                                                                                           |
|                   | 8  | 89.36        | 87.52        | 90.41        | [86, 87, 88, 84, 60, 78, 14, 54]                                                                                       |
|                   | 9  | 89.06        | 87.57        | 90.42        | [86, 87, 88, 84, 60, 78, 14, 54, 70]                                                                                   |
|                   | 10 | 88.56        | 87.56        | 90.27        | [86, 87, 88, 84, 60, 78, 14, 54, 70, 53]                                                                               |
|                   | 11 | 88.12        | 87.50        | 90.25        | [86, 87, 88, 84, 60, 78, 14, 54, 70, 53, 64]                                                                           |
|                   | 12 | 87.66        | 87.38        | 90.18        | [86, 87, 88, 84, 60, 78, 14, 54, 70, 53, 64, 2]                                                                        |
|                   | 13 | 87.79        | 87.23        | 90.18        | [86, 87, 88, 84, 60, 78, 14, 54, 70, 53, 64, 2, 30]                                                                    |
|                   | 14 | 87.58        | 87.23        | 90.28        | [86, 87, 88, 84, 60, 78, 14, 54, 70, 53, 64, 2, 30, 62]                                                                |
|                   | 15 | 87.57        | 87.11        | 90.33        | [86, 87, 88, 84, 60, 78, 14, 54, 70, 53, 64, 2, 30, 62, 66]                                                            |
|                   | 16 | 87.34        | 87.07        | 90.32        | [86, 87, 88, 84, 60, 78, 14, 54, 70, 53, 64, 2, 30, 62, 66, 79]                                                        |
|                   | 17 | 86.90        | 86.88        | 90.23        | [86, 87, 88, 84, 60, 78, 14, 54, 70, 53, 64, 2, 30, 62, 66, 79, 59]                                                    |
|                   | 18 | 86.88        | 86.83        | 90.25        | [86, 87, 88, 84, 60, 78, 14, 54, 70, 53, 64, 2,                                                                        |

|                   |    |       |       |       |                                                                                                            |
|-------------------|----|-------|-------|-------|------------------------------------------------------------------------------------------------------------|
|                   |    |       |       |       | 30, 62, 66, 79, 59, 63]                                                                                    |
| <b>gini_index</b> | 19 | 86.86 | 86.83 | 90.24 | [86, 87, 88, 84, 60, 78, 14, 54, 70, 53, 64, 2, 30, 62, 66, 79, 59, 63, 5]                                 |
|                   | 20 | 86.48 | 86.58 | 90.18 | [86, 87, 88, 84, 60, 78, 14, 54, 70, 53, 64, 2, 30, 62, 66, 79, 59, 63, 5, 83]                             |
|                   | 21 | 86.18 | 86.59 | 90.33 | [86, 87, 88, 84, 60, 78, 14, 54, 70, 53, 64, 2, 30, 62, 66, 79, 59, 63, 5, 83, 44]                         |
|                   | 22 | 85.99 | 86.43 | 90.34 | [86, 87, 88, 84, 60, 78, 14, 54, 70, 53, 64, 2, 30, 62, 66, 79, 59, 63, 5, 83, 44, 15]                     |
|                   | 23 | 86.04 | 86.34 | 90.33 | [86, 87, 88, 84, 60, 78, 14, 54, 70, 53, 64, 2, 30, 62, 66, 79, 59, 63, 5, 83, 44, 15, 69]                 |
|                   | 24 | 85.90 | 86.30 | 90.42 | [86, 87, 88, 84, 60, 78, 14, 54, 70, 53, 64, 2, 30, 62, 66, 79, 59, 63, 5, 83, 44, 15, 69, 74]             |
|                   | 25 | 85.43 | 86.08 | 90.43 | [86, 87, 88, 84, 60, 78, 14, 54, 70, 53, 64, 2, 30, 62, 66, 79, 59, 63, 5, 83, 44, 15, 69, 74, 23]         |
|                   | 26 | 85.44 | 85.82 | 90.63 | [86, 87, 88, 84, 60, 78, 14, 54, 70, 53, 64, 2, 30, 62, 66, 79, 59, 63, 5, 83, 44, 15, 69, 74, 23, 16]     |
|                   | 27 | 85.53 | 85.56 | 90.64 | [86, 87, 88, 84, 60, 78, 14, 54, 70, 53, 64, 2, 30, 62, 66, 79, 59, 63, 5, 83, 44, 15, 69, 74, 23, 16, 24] |
|                   | 28 | 85.27 | 85.27 | 90.63 | [86, 87, 88, 84, 60, 78, 14, 54, 70, 53, 64, 2, 30, 62, 66, 79, 59, 63, 5, 83, 44, 15, 69, 74,             |

|                   |    |              |              |       |                                                                                                                       |
|-------------------|----|--------------|--------------|-------|-----------------------------------------------------------------------------------------------------------------------|
|                   |    |              |              |       | 23, 16, 24, 3]                                                                                                        |
| <b>gini_index</b> | 29 | 85.18        | 84.49        | 90.56 | [86, 87, 88, 84, 60, 78, 14, 54, 70, 53, 64, 2, 30, 62, 66, 79, 59, 63, 5, 83, 44, 15, 69, 74, 23, 16, 24, 3, 68]     |
|                   | 30 | 85.03333333  | 84.19        | 90.55 | [86, 87, 88, 84, 60, 78, 14, 54, 70, 53, 64, 2, 30, 62, 66, 79, 59, 63, 5, 83, 44, 15, 69, 74, 23, 16, 24, 3, 68, 19] |
| <b>t_score</b>    | 1  | 77.35        | 79.28        | 79.35 | [87]                                                                                                                  |
|                   | 2  | 84.28        | 84.09        | 85.06 | [87 86]                                                                                                               |
|                   | 3  | 86.52        | 85.70        | 86.92 | [87 86 88]                                                                                                            |
|                   | 4  | 87.67        | 86.22        | 87.86 | [87 86 88 84]                                                                                                         |
|                   | 5  | 88.37        | 86.57        | 88.42 | [87 86 88 84 70]                                                                                                      |
|                   | 6  | 88.70        | 86.80        | 88.77 | [87 86 88 84 70 60]                                                                                                   |
|                   | 7  | 88.84        | 86.94        | 89.02 | [87 86 88 84 70 60 78]                                                                                                |
|                   | 8  | <b>88.85</b> | 87.01        | 89.23 | [87 86 88 84 70 60 78 68]                                                                                             |
|                   | 9  | 88.81        | 87.07        | 89.40 | [87 86 88 84 70 60 78 68 53]                                                                                          |
|                   | 10 | 88.75        | 87.11        | 89.53 | [87 86 88 84 70 60 78 68 53 64]                                                                                       |
|                   | 11 | 88.70        | <b>87.13</b> | 89.64 | [87 86 88 84 70 60 78 68 53 64 16]                                                                                    |
|                   | 12 | 88.66        | <b>87.13</b> | 89.74 | [87 86 88 84 70 60 78 68 53 64 16 83]                                                                                 |
|                   | 13 | 88.60        | 87.12        | 89.83 | [87 86 88 84 70 60 78 68 53 64 16 83 32]                                                                              |
|                   | 14 | 88.54        | 87.09        | 89.89 | [87 86 88 84 70 60 78 68 53 64 16 83 32 19]                                                                           |
|                   | 15 | 88.47        | 87.05        | 89.95 | [87 86 88 84 70 60 78 68 53 64 16 83 32 19 2]                                                                         |
|                   | 16 | 88.38        | 87.02        | 90.00 | [87 86 88 84 70 60 78 68 53 64 16 83 32 19 2 12]                                                                      |
|                   | 17 | 88.28        | 86.97        | 90.04 | [87 86 88 84 70 60 78 68 53 64 16 83 32 19 2 12 3]                                                                    |
|                   | 18 | 88.16        | 86.91        | 90.08 | [87 86 88 84 70 60 78 68 53 64 16 83 32 19 2 12 3 23]                                                                 |
|                   | 19 | 88.04        | 86.86        | 90.11 | [87 86 88 84 70 60 78 68 53 64 16 83 32 19 2 12 3 23 26]                                                              |

|                     |    |       |       |              |                                                                                                    |
|---------------------|----|-------|-------|--------------|----------------------------------------------------------------------------------------------------|
| <b>t_score</b>      | 20 | 87.94 | 86.80 | 90.14        | [87 86 88 84 70 60 78 68<br>53 64 16 83 32 19 2 12<br>3 23 26 59]                                  |
|                     | 21 | 87.84 | 86.75 | 90.16        | [87 86 88 84 70 60 78 68<br>53 64 16 83 32 19 2 12<br>3 23 26 59 82]                               |
|                     | 22 | 87.73 | 86.68 | 90.19        | [87 86 88 84 70 60 78 68<br>53 64 16 83 32 19 2 12<br>3 23 26 59 82 50]                            |
|                     | 23 | 87.62 | 86.61 | 90.21        | [87 86 88 84 70 60 78 68<br>53 64 16 83 32 19 2 12<br>3 23 26 59 82 50 51]                         |
|                     | 24 | 87.52 | 86.53 | 90.23        | [87 86 88 84 70 60 78 68<br>53 64 16 83 32 19 2 12<br>3 23 26 59 82 50 51 14]                      |
|                     | 25 | 87.42 | 86.46 | 90.25        | [87 86 88 84 70 60 78 68<br>53 64 16 83 32 19 2 12<br>3 23 26 59 82 50 51 14 79]                   |
|                     | 26 | 87.33 | 86.41 | 90.27        | [87 86 88 84 70 60 78 68<br>53 64 16 83 32 19 2 12<br>3 23 26 59 82 50 51 14 79<br>73]             |
|                     | 27 | 87.23 | 86.36 | 90.28        | [87 86 88 84 70 60 78 68<br>53 64 16 83 32 19 2 12<br>3 23 26 59 82 50 51 14 79<br>73 22]          |
|                     | 28 | 87.13 | 86.30 | 90.29        | [87 86 88 84 70 60 78 68<br>53 64 16 83 32 19 2 12<br>3 23 26 59 82 50 51 14 79<br>73 22 35]       |
|                     | 29 | 87.03 | 86.24 | 90.30        | [87 86 88 84 70 60 78 68<br>53 64 16 83 32 19 2 12<br>3 23 26 59 82 50 51 14 79<br>73 22 35 80]    |
|                     | 30 | 86.94 | 86.16 | <b>90.31</b> | [87 86 88 84 70 60 78 68<br>53 64 16 83 32 19 2 12<br>3 23 26 59 82 50 51 14 79<br>73 22 35 80 20] |
| <b>fisher_score</b> | 1  | 77.35 | 79.28 | 79.35        | [87]                                                                                               |
|                     | 2  | 84.28 | 84.09 | 85.06        | [87 86]                                                                                            |
|                     | 3  | 86.54 | 85.69 | 86.92        | [87 86 88]                                                                                         |
|                     | 4  | 87.69 | 86.21 | 87.86        | [87 86 88 84]                                                                                      |
|                     | 5  | 88.38 | 86.56 | 88.42        | [87 86 88 84 70]                                                                                   |
|                     | 6  | 88.69 | 86.73 | 88.79        | [87 86 88 84 70 60]                                                                                |



|                     |    |              |              |       |                                                                               |
|---------------------|----|--------------|--------------|-------|-------------------------------------------------------------------------------|
| <b>fisher_score</b> | 7  | 88.87        | 86.85        | 89.07 | [87 86 88 84 70 60 68]                                                        |
|                     | 8  | <b>88.92</b> | 86.93        | 89.27 | [87 86 88 84 70 60 68 78]                                                     |
|                     | 9  | 88.89        | 86.97        | 89.43 | [87 86 88 84 70 60 68 78<br>16]                                               |
|                     | 10 | 88.85        | <b>86.99</b> | 89.57 | [87 86 88 84 70 60 68 78<br>16 53]                                            |
|                     | 11 | 88.80        | 86.97        | 89.67 | [87 86 88 84 70 60 68 78<br>16 53 32]                                         |
|                     | 12 | 88.73        | 86.95        | 89.77 | [87 86 88 84 70 60 68 78<br>16 53 32 83]                                      |
|                     | 13 | 88.64        | 86.94        | 89.84 | [87 86 88 84 70 60 68 78<br>16 53 32 83 50]                                   |
|                     | 14 | 88.54        | 86.91        | 89.90 | [87 86 88 84 70 60 68 78<br>16 53 32 83 50 12]                                |
|                     | 15 | 88.43        | 86.88        | 89.95 | [87 86 88 84 70 60 68 78<br>16 53 32 83 50 12 64]                             |
|                     | 16 | 88.32        | 86.84        | 90.00 | [87 86 88 84 70 60 68 78<br>16 53 32 83 50 12 64 59]                          |
|                     | 17 | 88.22        | 86.79        | 90.04 | [87 86 88 84 70 60 68 78<br>16 53 32 83 50 12 64 59<br>19]                    |
|                     | 18 | 88.12        | 86.74        | 90.07 | [87 86 88 84 70 60 68 78<br>16 53 32 83 50 12 64 59<br>19 23]                 |
|                     | 19 | 88.01        | 86.69        | 90.10 | [87 86 88 84 70 60 68 78<br>16 53 32 83 50 12 64 59<br>19 23 2]               |
|                     | 20 | 87.91        | 86.64        | 90.13 | [87 86 88 84 70 60 68 78<br>16 53 32 83 50 12 64 59<br>19 23 2 3]             |
|                     | 21 | 87.82        | 86.58        | 90.15 | [87 86 88 84 70 60 68 78<br>16 53 32 83 50 12 64 59<br>19 23 2 3 80]          |
|                     | 22 | 87.72        | 86.52        | 90.17 | [87 86 88 84 70 60 68 78<br>16 53 32 83 50 12 64 59<br>19 23 2 3 80 82]       |
|                     | 23 | 87.61        | 86.46        | 90.20 | [87 86 88 84 70 60 68 78<br>16 53 32 83 50 12 64 59<br>19 23 2 3 80 82 26]    |
|                     | 24 | 87.50        | 86.38        | 90.22 | [87 86 88 84 70 60 68 78<br>16 53 32 83 50 12 64 59<br>19 23 2 3 80 82 26 35] |
|                     | 25 | 87.38        | 86.32        | 90.24 | [87 86 88 84 70 60 68 78<br>16 53 32 83 50 12 64 59]                          |

|                     |    |              |              |              |                                                                                                    |
|---------------------|----|--------------|--------------|--------------|----------------------------------------------------------------------------------------------------|
|                     |    |              |              |              | 19 23 2 3 80 82 26 35<br>22]                                                                       |
| <b>fisher_score</b> | 26 | 87.28        | 86.24        | 90.25        | [87 86 88 84 70 60 68 78<br>16 53 32 83 50 12 64 59<br>19 23 2 3 80 82 26 35<br>22 79]             |
|                     | 27 | 87.18        | 86.17        | 90.26        | [87 86 88 84 70 60 68 78<br>16 53 32 83 50 12 64 59<br>19 23 2 3 80 82 26 35<br>22 79 14]          |
|                     | 28 | 87.09        | 86.10        | 90.26        | [87 86 88 84 70 60 68 78<br>16 53 32 83 50 12 64 59<br>19 23 2 3 80 82 26 35<br>22 79 14 44]       |
|                     | 29 | 87.00        | 86.03        | 90.27        | [87 86 88 84 70 60 68 78<br>16 53 32 83 50 12 64 59<br>19 23 2 3 80 82 26 35<br>22 79 14 44 85]    |
|                     | 30 | 86.91        | 85.96        | <b>90.27</b> | [87 86 88 84 70 60 68 78<br>16 53 32 83 50 12 64 59<br>19 23 2 3 80 82 26 35<br>22 79 14 44 85 54] |
| <b>FCD</b>          | 1  | 90.03333333  | 89.69        | 90.82        | [86]                                                                                               |
|                     | 2  | <b>91.14</b> | 89.80        | 90.80        | [86, 41]                                                                                           |
|                     | 3  | 91.05        | 89.92        | 90.77        | [86, 41, 24]                                                                                       |
|                     | 4  | 91.00        | 89.97        | 90.79        | [86, 41, 24, 37]                                                                                   |
|                     | 5  | 90.87        | 90.02        | 90.81        | [86, 41, 24, 37, 62]                                                                               |
|                     | 6  | 90.70        | <b>90.05</b> | 90.82        | [86, 41, 24, 37, 62, 25]                                                                           |
|                     | 7  | 90.50        | 89.89        | 90.88        | [86, 41, 24, 37, 62, 25,<br>73]                                                                    |
|                     | 8  | 90.31        | 89.42        | 90.91        | [86, 41, 24, 37, 62, 25,<br>73, 66]                                                                |
|                     | 9  | 90.14        | 89.00        | 90.93        | [86, 41, 24, 37, 62, 25,<br>73, 66, 79]                                                            |
|                     | 10 | 89.95        | 88.68        | 90.94        | [86, 41, 24, 37, 62, 25,<br>73, 66, 79, 42]                                                        |
|                     | 11 | 89.69        | 88.25        | <b>90.94</b> | [86, 41, 24, 37, 62, 25,<br>73, 66, 79, 42, 20]                                                    |
|                     | 12 | 89.41        | 87.85        | 90.92        | [86, 41, 24, 37, 62, 25,<br>73, 66, 79, 42, 20, 32]                                                |
|                     | 13 | 89.16        | 87.44        | 90.91        | [86, 41, 24, 37, 62, 25,<br>73, 66, 79, 42, 20, 32,<br>43]                                         |
|                     | 14 | 88.93        | 87.08        | 90.91        | [86, 41, 24, 37, 62, 25,                                                                           |

|            |       |       |       |                          |                                                                                                     |
|------------|-------|-------|-------|--------------------------|-----------------------------------------------------------------------------------------------------|
|            |       |       |       |                          | 73, 66, 79, 42, 20, 32, 43, 46]                                                                     |
| <b>FCD</b> | 15    | 88.73 | 86.82 | 90.90                    | [86, 41, 24, 37, 62, 25, 73, 66, 79, 42, 20, 32, 43, 46, 84]                                        |
|            | 16    | 88.51 | 86.59 | 90.90                    | [86, 41, 24, 37, 62, 25, 73, 66, 79, 42, 20, 32, 43, 46, 84, 61]                                    |
|            | 17    | 88.30 | 86.39 | 90.89                    | [86, 41, 24, 37, 62, 25, 73, 66, 79, 42, 20, 32, 43, 46, 84, 61, 57]                                |
|            | 18    | 88.08 | 86.17 | 90.90                    | [86, 41, 24, 37, 62, 25, 73, 66, 79, 42, 20, 32, 43, 46, 84, 61, 57, 30]                            |
|            | 19    | 87.84 | 85.97 | 90.89                    | [86, 41, 24, 37, 62, 25, 73, 66, 79, 42, 20, 32, 43, 46, 84, 61, 57, 30, 45]                        |
|            | 20    | 87.62 | 85.77 | 90.89                    | [86, 41, 24, 37, 62, 25, 73, 66, 79, 42, 20, 32, 43, 46, 84, 61, 57, 30, 45, 40]                    |
|            | 21    | 87.40 | 85.57 | 90.89                    | [86, 41, 24, 37, 62, 25, 73, 66, 79, 42, 20, 32, 43, 46, 84, 61, 57, 30, 45, 40, 49]                |
|            | 22    | 87.17 | 85.39 | 90.89                    | [86, 41, 24, 37, 62, 25, 73, 66, 79, 42, 20, 32, 43, 46, 84, 61, 57, 30, 45, 40, 49, 58]            |
|            | 23    | 86.90 | 85.23 | 90.88                    | [86, 41, 24, 37, 62, 25, 73, 66, 79, 42, 20, 32, 43, 46, 84, 61, 57, 30, 45, 40, 49, 58, 83]        |
|            | 24    | 86.67 | 85.14 | 90.88                    | [86, 41, 24, 37, 62, 25, 73, 66, 79, 42, 20, 32, 43, 46, 84, 61, 57, 30, 45, 40, 49, 58, 83, 88]    |
|            | 25    | 86.45 | 85.05 | 90.87                    | [86, 41, 24, 37, 62, 25, 73, 66, 79, 42, 20, 32, 43, 46, 84, 61, 57, 30, 45, 40, 49, 58, 83, 88, 9] |
| 26         | 86.24 | 84.95 | 90.86 | [86, 41, 24, 37, 62, 25, |                                                                                                     |

|            |    |              |              |       |                                                                                                                         |
|------------|----|--------------|--------------|-------|-------------------------------------------------------------------------------------------------------------------------|
|            |    |              |              |       | 73, 66, 79, 42, 20, 32, 43, 46, 84, 61, 57, 30, 45, 40, 49, 58, 83, 88, 9, 71]                                          |
| <b>FCD</b> | 27 | 86.02        | 84.84        | 90.86 | [86, 41, 24, 37, 62, 25, 73, 66, 79, 42, 20, 32, 43, 46, 84, 61, 57, 30, 45, 40, 49, 58, 83, 88, 9, 71, 63]             |
|            | 28 | 85.77        | 84.71        | 90.86 | [86, 41, 24, 37, 62, 25, 73, 66, 79, 42, 20, 32, 43, 46, 84, 61, 57, 30, 45, 40, 49, 58, 83, 88, 9, 71, 63, 68]         |
|            | 29 | 85.53        | 84.58        | 90.85 | [86, 41, 24, 37, 62, 25, 73, 66, 79, 42, 20, 32, 43, 46, 84, 61, 57, 30, 45, 40, 49, 58, 83, 88, 9, 71, 63, 68, 75]     |
|            | 30 | 85.26        | 84.45        | 90.85 | [86, 41, 24, 37, 62, 25, 73, 66, 79, 42, 20, 32, 43, 46, 84, 61, 57, 30, 45, 40, 49, 58, 83, 88, 9, 71, 63, 68, 75, 54] |
| <b>FCQ</b> | 1  | 90.03        | 89.69        | 90.82 | [86]                                                                                                                    |
|            | 2  | 90.25        | 89.73        | 90.77 | [86, 25]                                                                                                                |
|            | 3  | <b>90.35</b> | 89.72        | 90.75 | [86, 25, 62]                                                                                                            |
|            | 4  | 90.09        | 89.73        | 90.76 | [86, 25, 62, 74]                                                                                                        |
|            | 5  | 89.91        | 89.82        | 90.84 | [86, 25, 62, 74, 73]                                                                                                    |
|            | 6  | 89.73        | 89.84        | 90.87 | [86, 25, 62, 74, 73, 66]                                                                                                |
|            | 7  | 89.54        | <b>89.87</b> | 90.89 | [86, 25, 62, 74, 73, 66, 5]                                                                                             |
|            | 8  | 89.26        | 89.83        | 90.88 | [86, 25, 62, 74, 73, 66, 5, 54]                                                                                         |
|            | 9  | 89.00        | 89.65        | 90.88 | [86, 25, 62, 74, 73, 66, 5, 54, 49]                                                                                     |
|            | 10 | 88.72        | 89.22        | 90.88 | [86, 25, 62, 74, 73, 66, 5, 54, 49, 63]                                                                                 |
|            | 11 | 88.45        | 88.70        | 90.89 | [86, 25, 62, 74, 73, 66, 5, 54, 49, 63, 8]                                                                              |
|            | 12 | 88.16        | 88.14        | 90.91 | [86, 25, 62, 74, 73, 66, 5, 54, 49, 63, 8, 17]                                                                          |
|            | 13 | 87.83        | 87.63        | 90.93 | [86, 25, 62, 74, 73, 66, 5, 54, 49, 63, 8, 17, 33]                                                                      |

|            |       |       |       |                                                    |                                                                                                    |
|------------|-------|-------|-------|----------------------------------------------------|----------------------------------------------------------------------------------------------------|
| <b>FCQ</b> | 14    | 87.55 | 87.11 | 90.93                                              | [86, 25, 62, 74, 73, 66, 5, 54, 49, 63, 8, 17, 33, 24]                                             |
|            | 15    | 87.23 | 86.65 | 90.93                                              | [86, 25, 62, 74, 73, 66, 5, 54, 49, 63, 8, 17, 33, 24, 81]                                         |
|            | 16    | 86.89 | 86.25 | 90.94                                              | [86, 25, 62, 74, 73, 66, 5, 54, 49, 63, 8, 17, 33, 24, 81, 29]                                     |
|            | 17    | 86.58 | 85.88 | 90.94                                              | [86, 25, 62, 74, 73, 66, 5, 54, 49, 63, 8, 17, 33, 24, 81, 29, 69]                                 |
|            | 18    | 86.19 | 85.57 | 90.94                                              | [86, 25, 62, 74, 73, 66, 5, 54, 49, 63, 8, 17, 33, 24, 81, 29, 69, 13]                             |
|            | 19    | 85.82 | 85.26 | 90.94                                              | [86, 25, 62, 74, 73, 66, 5, 54, 49, 63, 8, 17, 33, 24, 81, 29, 69, 13, 75]                         |
|            | 20    | 85.46 | 84.99 | 90.94                                              | [86, 25, 62, 74, 73, 66, 5, 54, 49, 63, 8, 17, 33, 24, 81, 29, 69, 13, 75, 58]                     |
|            | 21    | 85.14 | 84.72 | <b>90.94</b>                                       | [86, 25, 62, 74, 73, 66, 5, 54, 49, 63, 8, 17, 33, 24, 81, 29, 69, 13, 75, 58, 72]                 |
|            | 22    | 84.80 | 84.47 | 90.94                                              | [86, 25, 62, 74, 73, 66, 5, 54, 49, 63, 8, 17, 33, 24, 81, 29, 69, 13, 75, 58, 72, 27]             |
|            | 23    | 84.48 | 84.24 | 90.94                                              | [86, 25, 62, 74, 73, 66, 5, 54, 49, 63, 8, 17, 33, 24, 81, 29, 69, 13, 75, 58, 72, 27, 46]         |
|            | 24    | 84.18 | 84.01 | 90.93                                              | [86, 25, 62, 74, 73, 66, 5, 54, 49, 63, 8, 17, 33, 24, 81, 29, 69, 13, 75, 58, 72, 27, 46, 51]     |
|            | 25    | 83.89 | 83.81 | 90.92                                              | [86, 25, 62, 74, 73, 66, 5, 54, 49, 63, 8, 17, 33, 24, 81, 29, 69, 13, 75, 58, 72, 27, 46, 51, 61] |
| 26         | 83.61 | 83.60 | 90.91 | [86, 25, 62, 74, 73, 66, 5, 54, 49, 63, 8, 17, 33, |                                                                                                    |

|            |    |       |       |       |                                                                                                                        |
|------------|----|-------|-------|-------|------------------------------------------------------------------------------------------------------------------------|
|            |    |       |       |       | 24, 81, 29, 69, 13, 75, 58, 72, 27, 46, 51, 61, 77]                                                                    |
| <b>FCQ</b> | 27 | 83.33 | 83.42 | 90.90 | [86, 25, 62, 74, 73, 66, 5, 54, 49, 63, 8, 17, 33, 24, 81, 29, 69, 13, 75, 58, 72, 27, 46, 51, 61, 77, 78]             |
|            | 28 | 83.05 | 83.24 | 90.90 | [86, 25, 62, 74, 73, 66, 5, 54, 49, 63, 8, 17, 33, 24, 81, 29, 69, 13, 75, 58, 72, 27, 46, 51, 61, 77, 78, 39]         |
|            | 29 | 82.82 | 83.09 | 90.90 | [86, 25, 62, 74, 73, 66, 5, 54, 49, 63, 8, 17, 33, 24, 81, 29, 69, 13, 75, 58, 72, 27, 46, 51, 61, 77, 78, 39, 84]     |
|            | 30 | 82.60 | 82.95 | 90.89 | [86, 25, 62, 74, 73, 66, 5, 54, 49, 63, 8, 17, 33, 24, 81, 29, 69, 13, 75, 58, 72, 27, 46, 51, 61, 77, 78, 39, 84, 41] |
